# Supplementary material for: Thiol–ene synthesis and characterization of lithium bis(malonato)borate single-ion conducting gel polymer electrolytes
Source: Royal Society of Chemistry journal article supplement (doi:10.1039/c7sm01738c), 2017-01-01
Supplement: c7sm01738c1.pdf [file c7sm01738c1.pdf]

## Electronic Supplementary Information

# Thiol-ene Synthesis and Characterization of Lithium Bis(malonato)borate Single-Ion Conducting Gel Polymer Electrolytes

*Ryan L. Weber<sup>†</sup> and Mahesh K. Mahanthappa,<sup>†,§,\*</sup>*

<sup>†</sup> Department of Chemistry, University of Wisconsin–Madison, 1101 University Ave., Madison, WI 53706

<sup>§</sup> Department of Chemical Engineering & Materials Science, University of Minnesota, 421 Washington Ave, S.E., Minneapolis, MN 55455

\*Corresponding Author: [maheshkm@umn.edu](mailto:maheshkm@umn.edu); +1 (612) 625-4599

| Table of Contents                                                                                                                             | Page |
|-----------------------------------------------------------------------------------------------------------------------------------------------|------|
| <b>Figure S1.</b> <sup>1</sup> H NMR Spectrum of LiBNMB                                                                                       | S2   |
| <b>Figure S2.</b> Reference FTIR spectra of TMPT in PC at various concentrations                                                              | S3   |
| <b>Figure S3.</b> Isothermal frequency sweep modulus measurement 40 °C before and after heating to 130 °C                                     | S4   |
| <b>Figure S4.</b> Representative FTIR spectra of 75CL before and after thermally induced failure in the hermetically sealed conductivity cell | S5   |

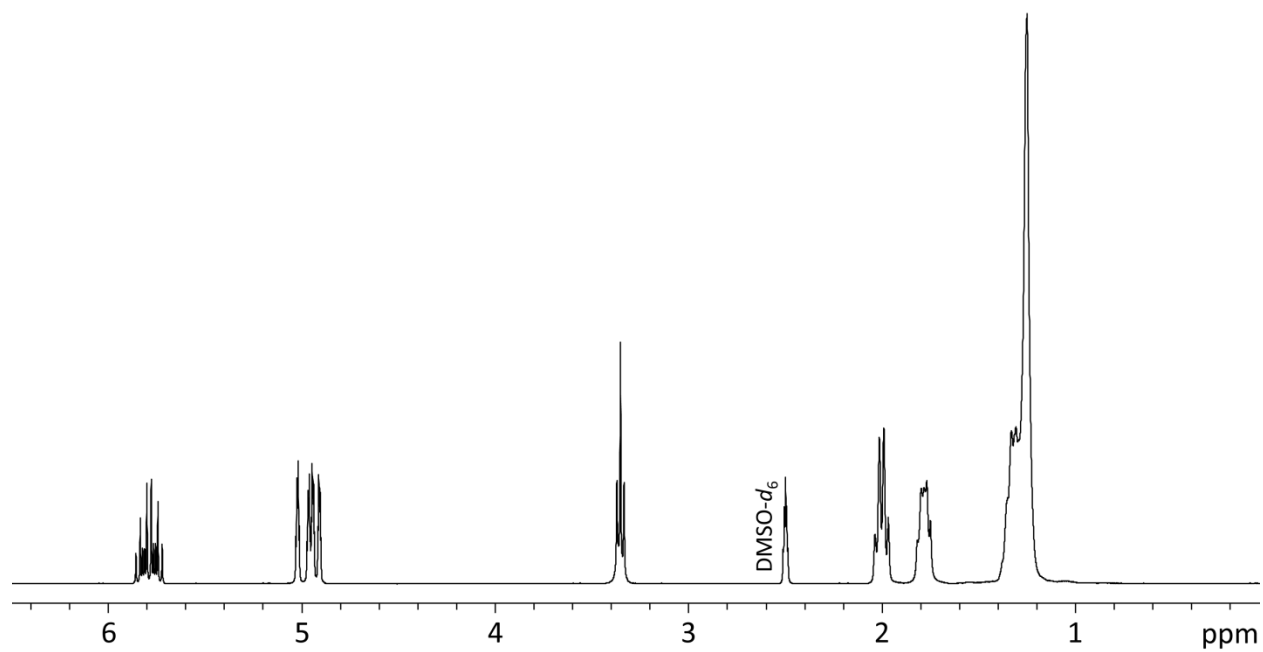

**Figure S1.**  $^1\text{H}$  NMR spectrum (300 MHz,  $\text{DMSO-}d_6$ , 22°C) of lithium bis(non-8-enyl-malonato) borate (LiBNMB).

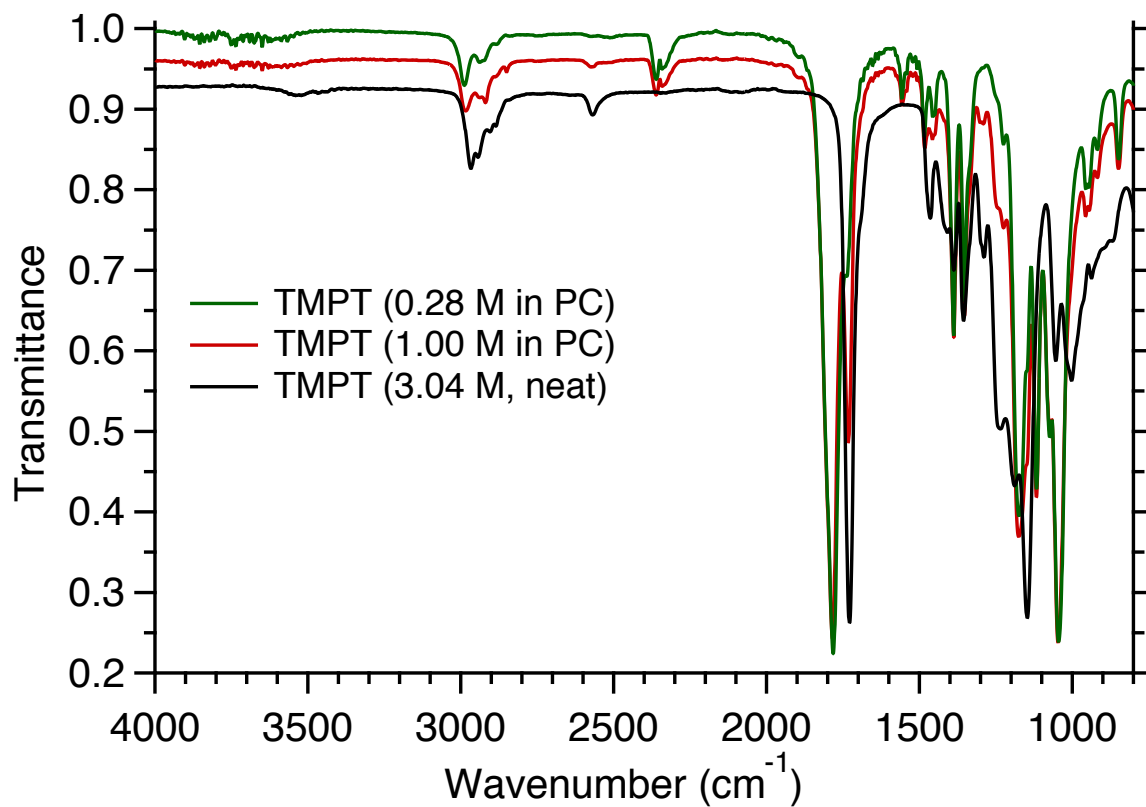

**Figure S2.** FTIR spectra of the trithiol TMPT in propylene carbonate at various concentrations, demonstrating the intensity of the thiol S-H peak at 2570 cm<sup>-1</sup>.

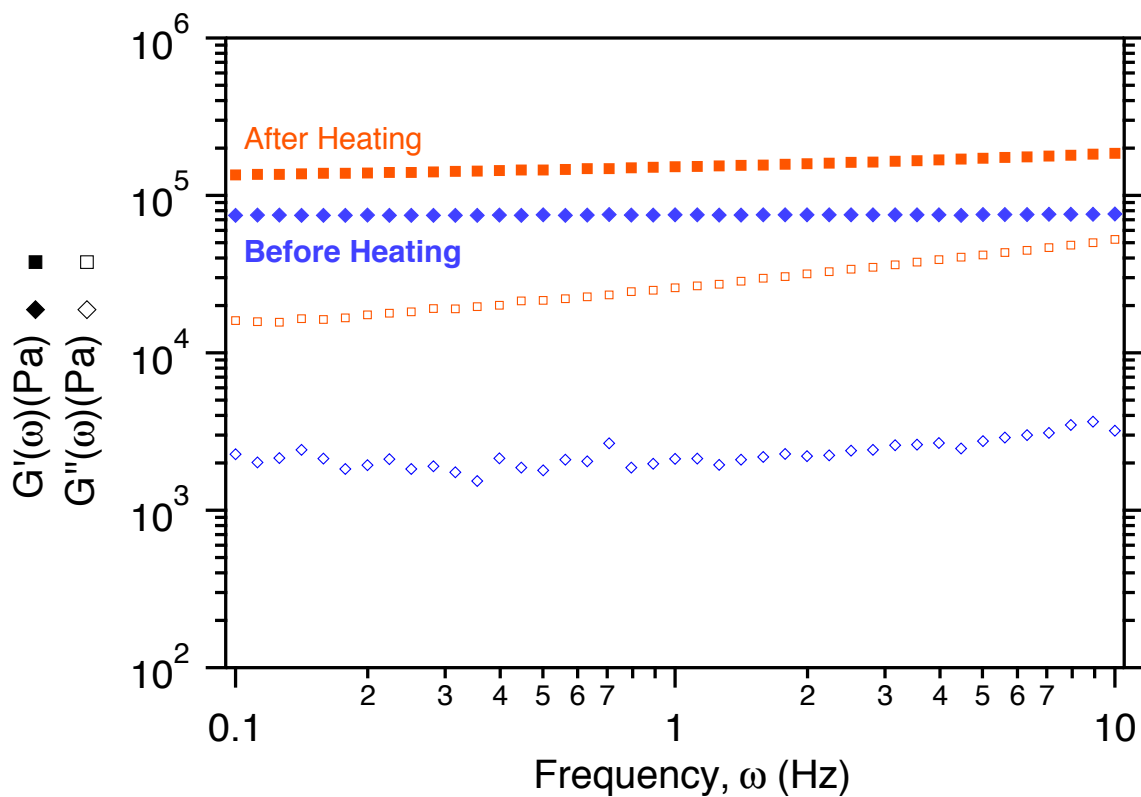

**Figure S3.** Isothermal frequency sweep for **100CL** at 40 °C before (*orange*) and after (*blue*) dynamic temperature ramp test between  $T = 40\text{--}130$  °C, indicating that the modulus of the material increases upon thermal cycling likely due to solvent evaporation during the test.

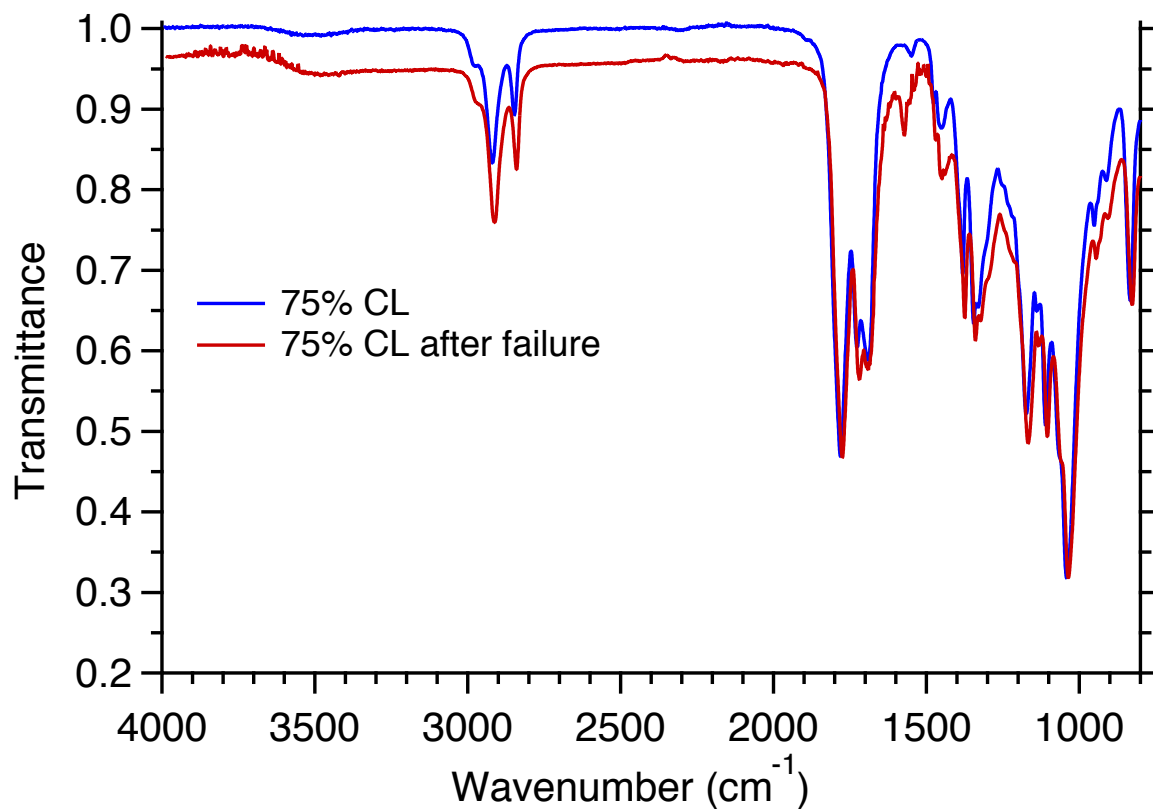

**Figure S4.** Representative FTIR spectral overlay of the **75CL** before (*blue*) and after (*red*) failure due to thermal expansion within the confinement of the hermetically sealed conductive cell, which indicates no appreciable changes in the spectra. Thus, the thiol-ene reaction does not revert upon heating.
